# Supplementary material for: An innovative Schiff-base colorimetric chemosensor for the selective detection of Cu2+ ions and its applications
Source: Royal Society of Chemistry journal article supplement (doi:10.1039/d4ra03097d), 2024-01-01
Supplement: d4ra03097d1.pdf [file d4ra03097d1.pdf]

## Supplementary Information

### An Innovative Schiff-Base Colorimetric Chemosensor for the Selective Detection of $\text{Cu}^{2+}$ ions and its applications

Ram Kumar<sup>a, b</sup>, Bholey Singh<sup>c\*</sup>, Parveen Gahlyan<sup>a</sup>, Abhishek Verma<sup>d</sup>, Mamta Bhandari<sup>e</sup>, Rita Kakkar<sup>e</sup>, Balaram Pani<sup>b\*</sup>,

<sup>a</sup>Department of Chemistry, University of Delhi, Delhi 110007, India

<sup>b</sup>Department of Chemistry, Bhaskaracharya College of Applied Sciences, University of Delhi, New Delhi 110075, India

<sup>c</sup>Department of Chemistry, Swami Shraddhanand College, University of Delhi, Delhi 110036, India

<sup>d</sup>Department of Chemistry, Kirori Mal College, University of Delhi, Delhi 110007, India

<sup>e</sup>Computational Chemistry Group, Department of Chemistry, University of Delhi, Delhi 110007, India

\* Corresponding author

\* Email: [bholeysingh@ss.du.ac.in](mailto:bholeysingh@ss.du.ac.in), [balarampani63@gmail.com](mailto:balarampani63@gmail.com)

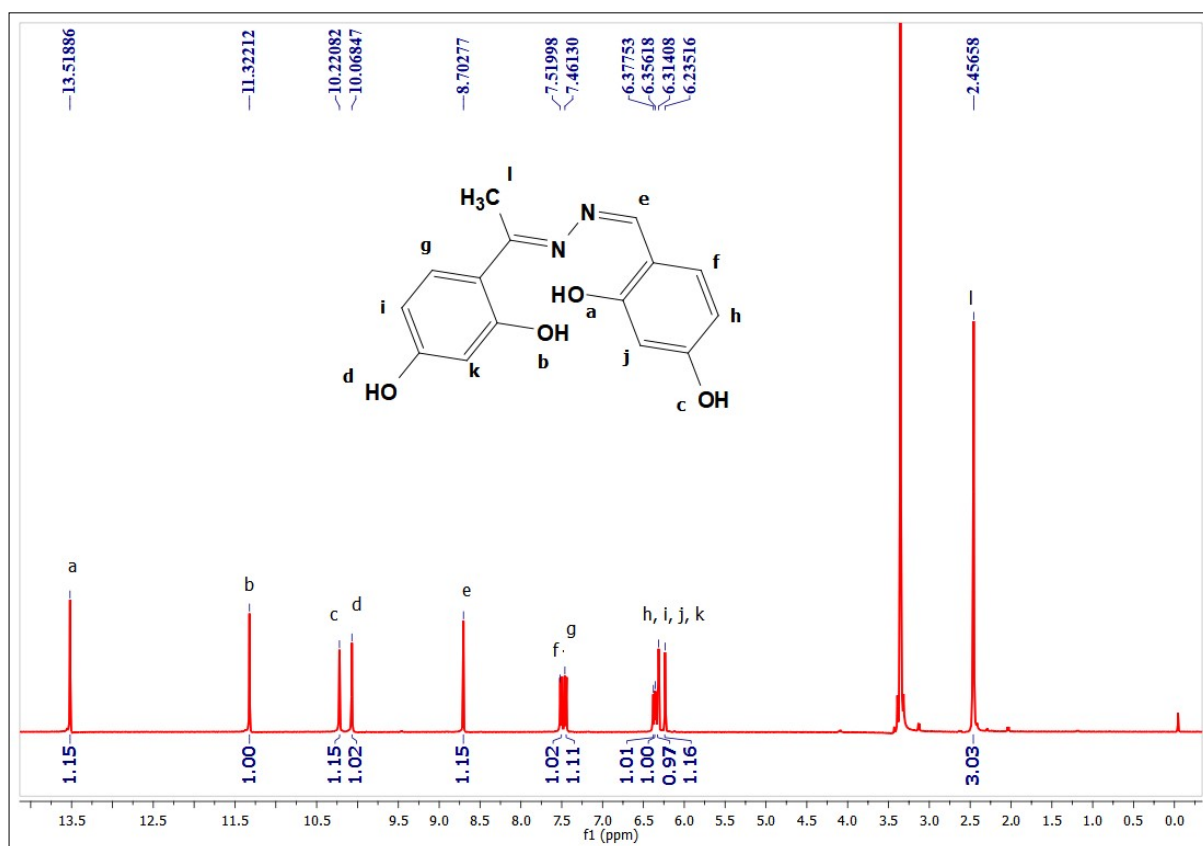

Figure S1. <sup>1</sup>H NMR of compound L in (DMSO-*d*<sub>6</sub>, 400 MHz)

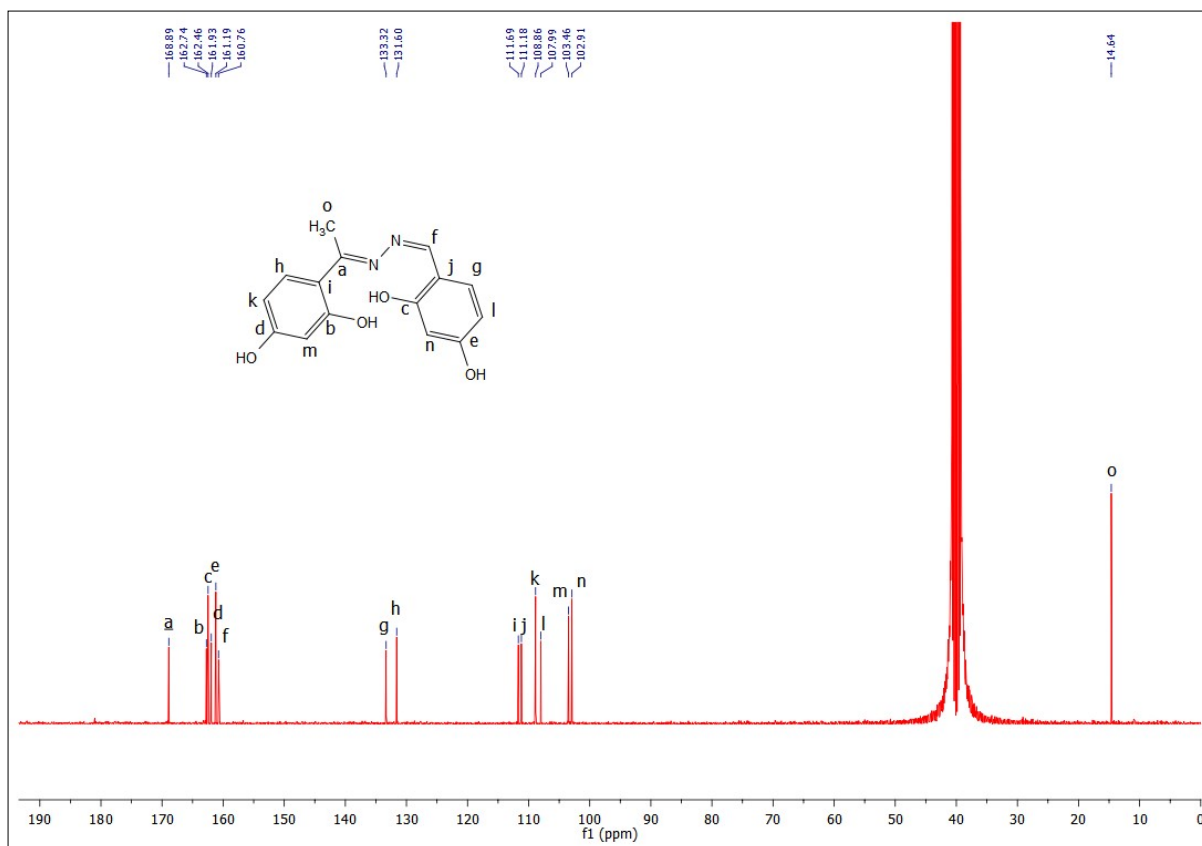

**Figure S2.**  $^{13}\text{C}$  NMR of compound L in ( $\text{DMSO-}d_6$ , 100 MHz)

MFE MS Spectrum

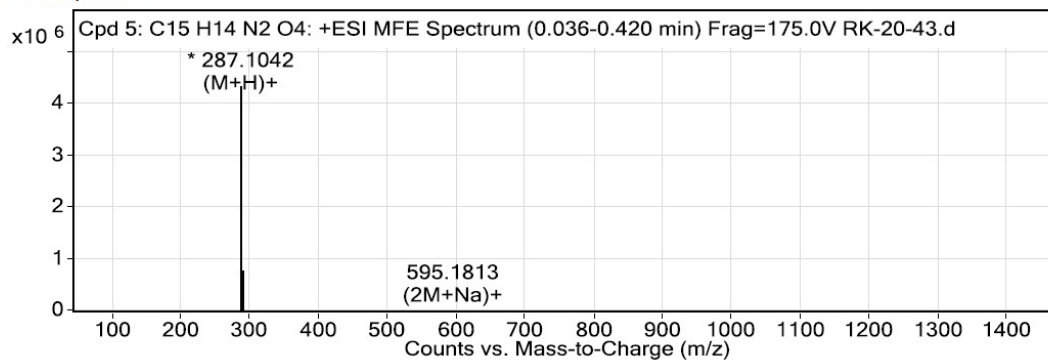

MFE MS Zoomed Spectrum

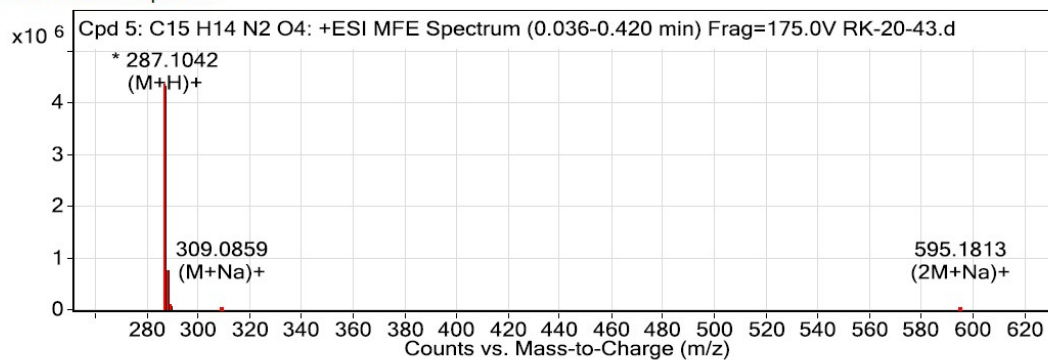

**Figure S3.** HRMS data of compound L

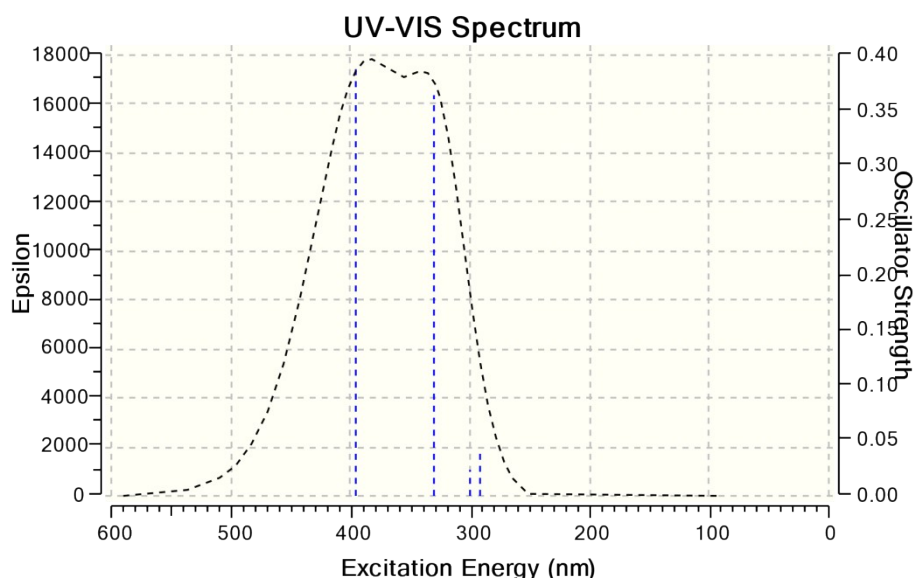

Figure S4 : Simulated spectrum of ligand L.

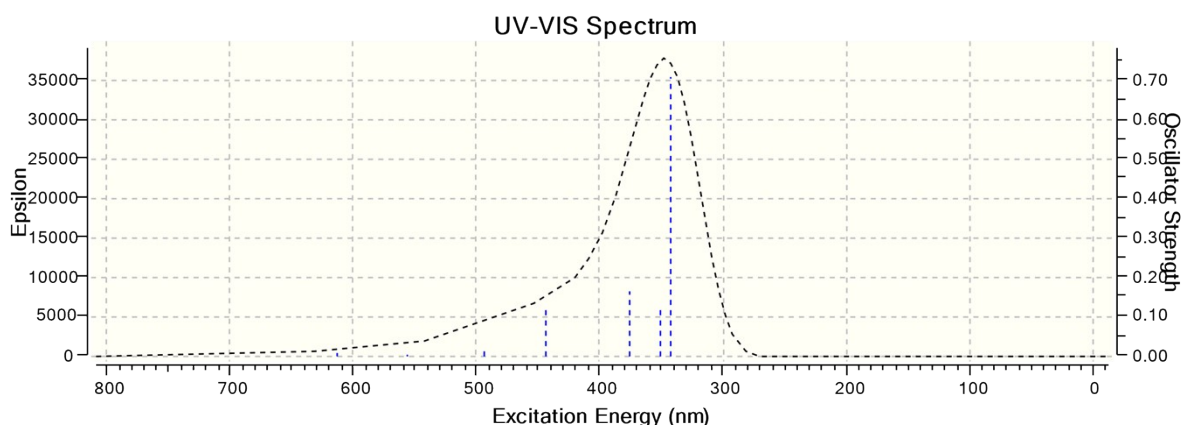

Figure S5: Simulated spectrum of the L-Cu<sup>2+</sup> complex.

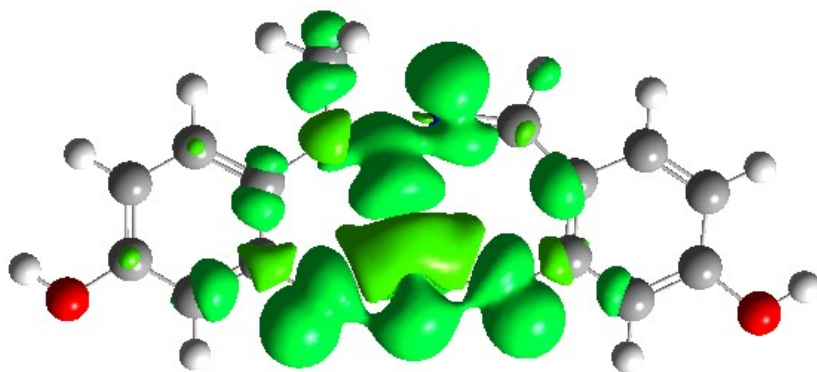

Figure S6: Mulliken spin-density distribution.

| <b>Table S1. Crystal data and structure refinement for ligand</b> |                                                               |
|-------------------------------------------------------------------|---------------------------------------------------------------|
| <b>Identification code</b>                                        | <b>L</b>                                                      |
| Empirical formula                                                 | C <sub>15</sub> H <sub>14</sub> N <sub>2</sub> O <sub>4</sub> |
| Temperature/K                                                     | 293(2)                                                        |
| Crystal system                                                    | triclinic                                                     |
| Space group                                                       | P -1                                                          |
| a/Å                                                               | 6.8450(7)                                                     |
| b/Å                                                               | 7.2531(8)                                                     |
| c/Å                                                               | 15.6037(17)                                                   |
| α/°                                                               | 95.832(3)                                                     |
| β/°                                                               | 98.967(3)                                                     |
| γ/°                                                               | 108.964(3)                                                    |
| Volume/Å <sup>3</sup>                                             | 714.00(13)                                                    |
| Z                                                                 | 14                                                            |
| ρ <sub>calc</sub> /cm <sup>3</sup>                                | 1.415                                                         |
| μ/mm <sup>-1</sup>                                                | 0.108                                                         |
| F(000)                                                            | 320.0                                                         |
| Radiation                                                         | Mo/K <sub>α</sub> (λ = 0.71073)                               |
| 2θ range for data collection/°                                    | 3.0431 to 27.8734                                             |
| Index ranges                                                      | -8 ≤ h ≤ 8, -8 ≤ k ≤ 8, -18 ≤ l ≤ 19                          |
| No of Reflections measured                                        | 2676                                                          |
| Independent reflections                                           | 2171                                                          |
| Goodness-of-fit on F <sup>2</sup>                                 | 1.089                                                         |
| R [F <sup>2</sup> > 2σ (F <sup>2</sup> )], wR(all data)           | 0.0746, 0.1762                                                |
|                                                                   |                                                               |

**Table S1.** Crystal data and structure refinement for ligand.

| <b>Excitation</b> | <b>Spin Multiplicity</b> | <b>Transition</b> | <b>Weight (%)</b> | <b>Excitation Energy</b> | <b>Wavelength (nm)</b> | <b>Oscillator Strength</b> |
|-------------------|--------------------------|-------------------|-------------------|--------------------------|------------------------|----------------------------|
|                   |                          |                   |                   |                          |                        |                            |

|   |                  |                    |           | (eV)        |            | (f)           |
|---|------------------|--------------------|-----------|-------------|------------|---------------|
| 1 | <sup>1</sup> A'' | HOMO-1→LUMO        | 49        | 3.07        | 404        | 0.0008        |
| 2 | <sup>1</sup> A'  | <b>HOMO→LUMO</b>   | <b>48</b> | <b>3.14</b> | <b>395</b> | <b>0.3934</b> |
| 3 | <sup>1</sup> A'  | <b>HOMO-2→LUMO</b> | <b>47</b> | <b>3.75</b> | <b>331</b> | <b>0.3633</b> |
| 4 | <sup>1</sup> A'  | HOMO-3→LUMO        | 34        | 4.12        | 301        | 0.0233        |
| 5 | <sup>1</sup> A'  | HOMO→LUMO+1        | 30        | 4.25        | 292        | 0.0397        |
| 6 | <sup>1</sup> A'' | HOMO-1→LUMO+1      | 42        | 4.47        | 277        | 0.0002        |

**Table S2:** Excitation energies and oscillator strengths of ligand **L**.

| Excitation | Spin Multiplicity | Transition     | Weight (%) | Excitation Energy (eV) | Wavelength (nm) | Oscillator Strength (f) |
|------------|-------------------|----------------|------------|------------------------|-----------------|-------------------------|
| 4          | <sup>2</sup> A'   | β HOMO-3→LUMO  | 33         | 2.02                   | 613             | 0.0073                  |
| 5          | <sup>4</sup> A'   | β HOMO→LUMO+1  | 48         | 2.07                   | 599             | 0.0006                  |
|            |                   | α HOMO→LUMO    | 42         |                        |                 |                         |
| 6          | <sup>2</sup> A'   | β HOMO-3→LUMO  | 22         | 2.23                   | 556             | 0.0027                  |
| 8          | <sup>2</sup> A'   | β HOMO-10→LUMO | 39         | 2.51                   | 494             | 0.0233                  |
| <b>10</b>  | <sup>2</sup> A'   | α HOMO→LUMO    | <b>18</b>  | <b>2.79</b>            | <b>444</b>      | <b>0.1206</b>           |
| 11         | <sup>4</sup> A'   | α HOMO-2→LUMO  |            | 2.83                   | 438             | 0.0010                  |

**Table S3:** Excitation energies and oscillator strengths for the complex

| S.No | Limit of Detection (LOD; nM) |
|------|------------------------------|
| 1    | 42.091                       |
| 2    | 42.10                        |

|                |                |
|----------------|----------------|
| 3              | 42.087         |
| <b>Average</b> | <b>42.0927</b> |

**Table S4:** Showing the trials of calculated detection limits.

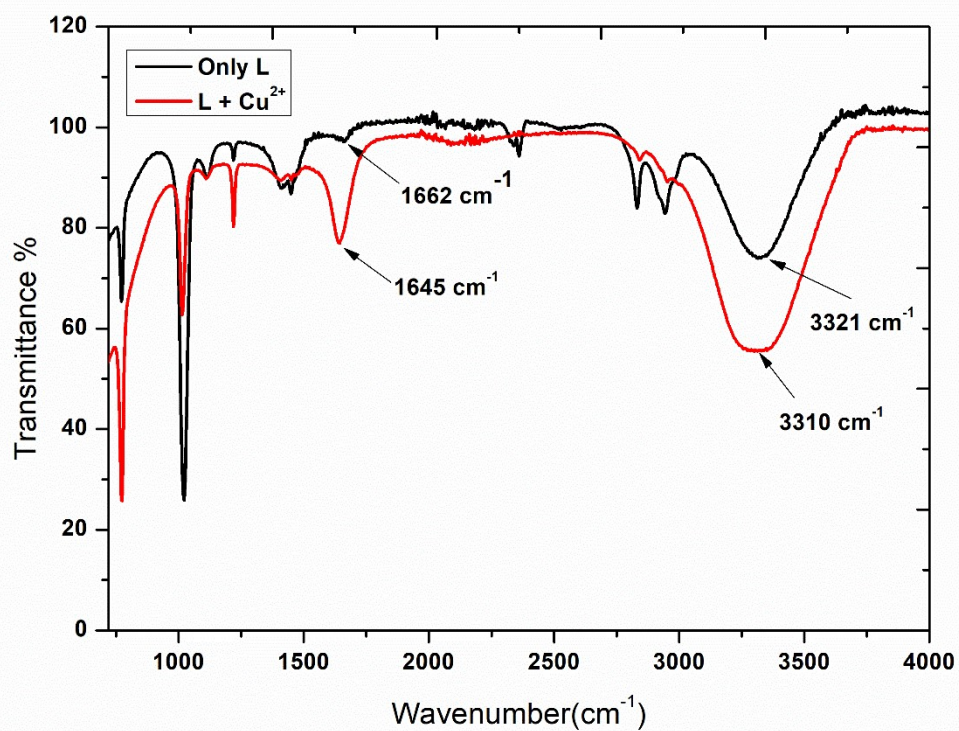

**Figure S7.** IR Spectrum of ligand L & L-Cu<sup>2+</sup>
